# Supplementary material for: Predicting habitat suitability and range shifts under projected climate change for two octocorals in the north-east Atlantic
Source: PeerJ journal article supplement (doi:10.7717/peerj.13509), 2022-05-27
Supplement: Supplementary_figures.pdf [file Supplementary_figures.pdf]

Predicting habitat suitability and range shifts under projected climate change for two  
octocorals in the north-east Atlantic

Supplementary Figures

Jenkins and Stevens 2022

**Contents**

|                     |   |
|---------------------|---|
| Figure S1 . . . . . | 2 |
| Figure S2 . . . . . | 5 |

Figure S1

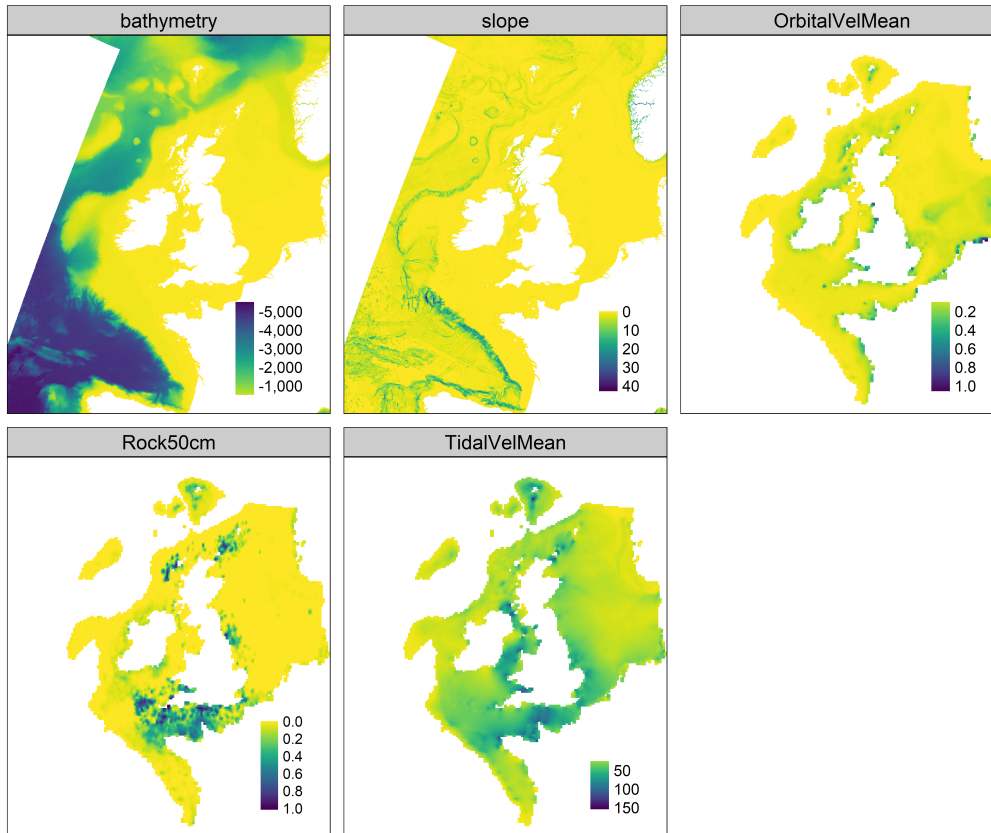

Figure S1. Thematic map of each raster predictor variable considered in the species distribution models.

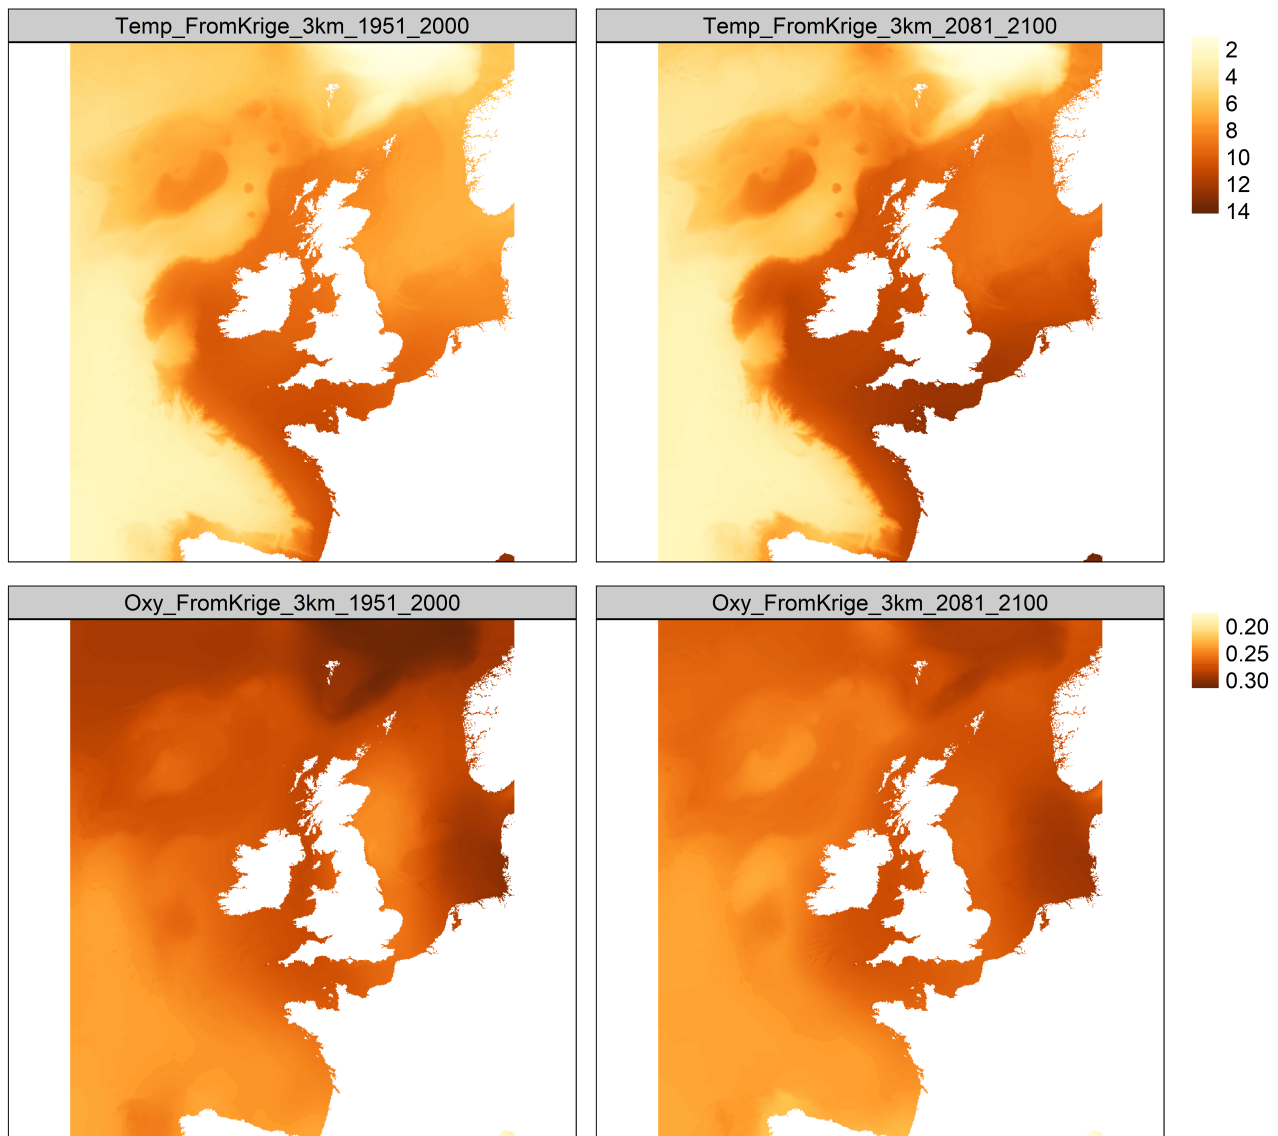

**Figure S1.** Thematic map of each raster predictor variable considered in the species distribution models.

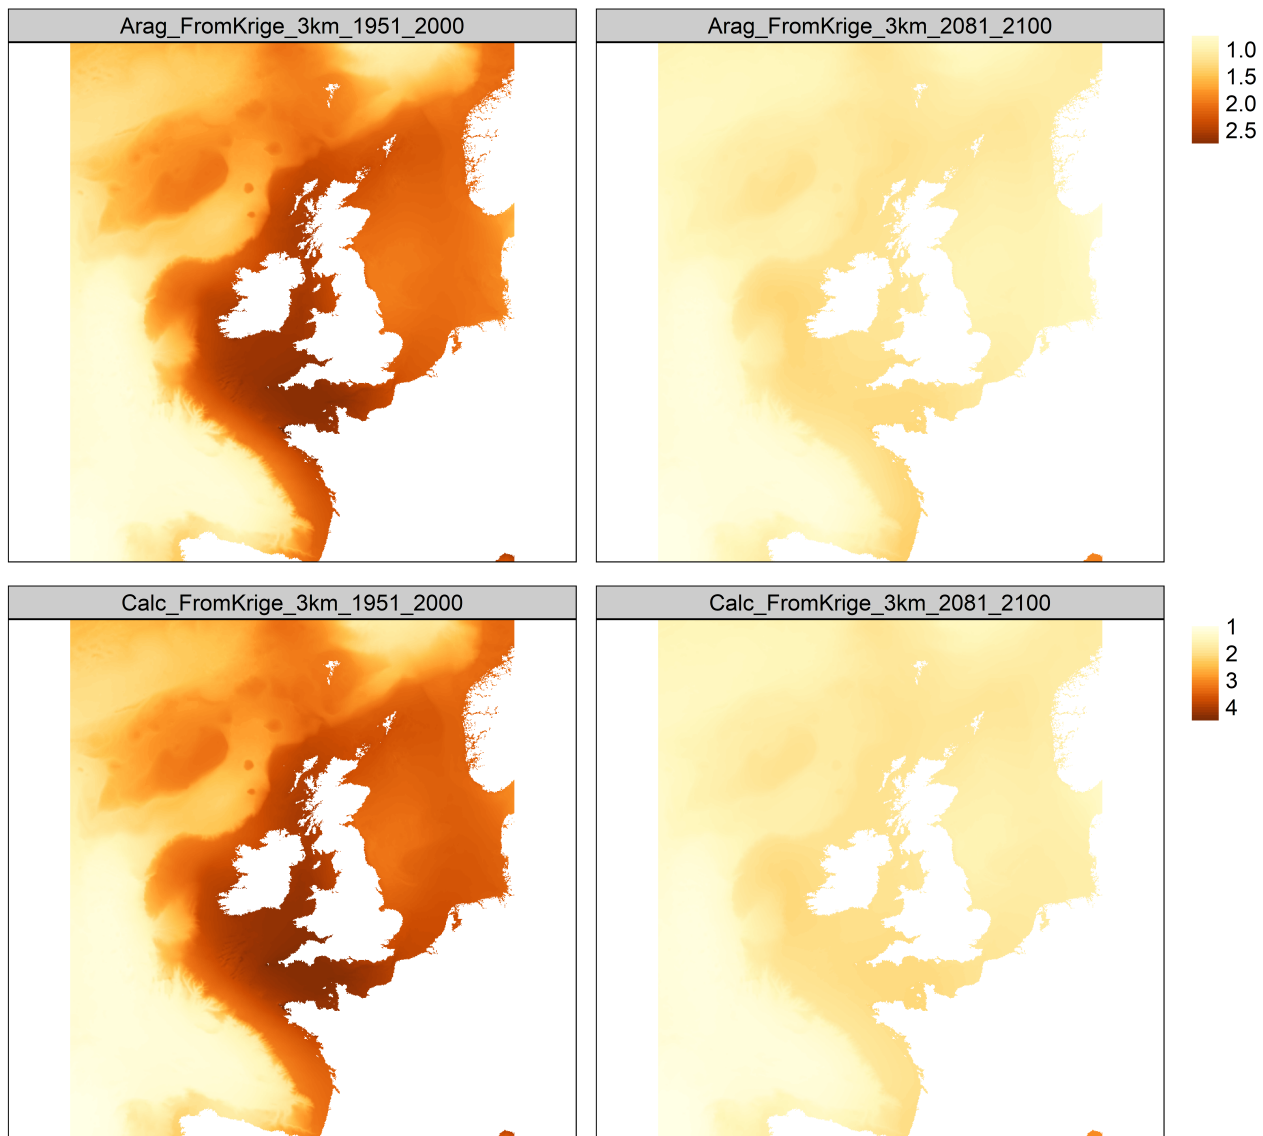

**Figure S1.** Thematic map of each raster predictor variable considered in the species distribution models.

**Figure S2**

| <i>Eunicella verrucosa</i> |          |             |             |             |             |             | <i>Alcyonium digitatum</i> |          |             |             |             |             |             |
|----------------------------|----------|-------------|-------------|-------------|-------------|-------------|----------------------------|----------|-------------|-------------|-------------|-------------|-------------|
| fc                         | rm       | auc.val.avg | auc.val.sd  | cbi.val.avg | cbi.val.sd  | delta.AICc  | fc                         | rm       | auc.val.avg | auc.val.sd  | cbi.val.avg | cbi.val.sd  | delta.AICc  |
| L                          | 1        | 0.88        | 0.09        | 0.88        | 0.19        | 1051.20     | L                          | 1        | 0.76        | 0.13        | 0.71        | 0.33        | 3436.31     |
| L                          | 2        | 0.88        | 0.09        | 0.87        | 0.18        | 1059.57     | L                          | 2        | 0.76        | 0.13        | 0.71        | 0.32        | 3269.81     |
| L                          | 3        | 0.88        | 0.09        | 0.88        | 0.18        | 1068.03     | L                          | 3        | 0.76        | 0.13        | 0.71        | 0.32        | 3129.00     |
| L                          | 4        | 0.88        | 0.09        | 0.88        | 0.17        | 1076.57     | L                          | 4        | 0.76        | 0.13        | 0.71        | 0.32        | 3026.15     |
| L                          | 5        | 0.88        | 0.09        | 0.89        | 0.17        | 1085.27     | L                          | 5        | 0.76        | 0.13        | 0.70        | 0.33        | 2927.29     |
| LQ                         | 1        | 0.90        | 0.04        | 0.91        | 0.04        | 315.24      | LQ                         | 1        | 0.78        | 0.10        | 0.95        | 0.06        | 562.41      |
| LQ                         | 2        | 0.90        | 0.04        | 0.91        | 0.05        | 343.17      | LQ                         | 2        | 0.78        | 0.11        | 0.96        | 0.03        | 980.09      |
| LQ                         | 3        | 0.90        | 0.04        | 0.91        | 0.05        | 410.16      | LQ                         | 3        | 0.77        | 0.11        | 0.93        | 0.09        | 1398.29     |
| LQ                         | 4        | 0.90        | 0.05        | 0.91        | 0.05        | 470.51      | LQ                         | 4        | 0.77        | 0.12        | 0.87        | 0.15        | 1825.30     |
| LQ                         | 5        | 0.90        | 0.05        | 0.90        | 0.06        | 492.79      | LQ                         | 5        | 0.77        | 0.13        | 0.78        | 0.25        | 2311.19     |
| <b>H</b>                   | <b>1</b> | <b>0.87</b> | <b>0.09</b> | <b>0.90</b> | <b>0.08</b> | <b>0.00</b> | H                          | 1        | 0.79        | 0.10        | 0.95        | 0.05        | 0.93        |
| H                          | 2        | 0.89        | 0.07        | 0.89        | 0.12        | 119.71      | <b>H</b>                   | <b>2</b> | <b>0.80</b> | <b>0.09</b> | <b>0.95</b> | <b>0.05</b> | <b>0.00</b> |
| H                          | 3        | 0.89        | 0.06        | 0.88        | 0.15        | 219.17      | H                          | 3        | 0.80        | 0.09        | 0.96        | 0.06        | 34.15       |
| H                          | 4        | 0.89        | 0.06        | 0.90        | 0.13        | 340.21      | H                          | 4        | 0.80        | 0.09        | 0.96        | 0.06        | 39.58       |
| H                          | 5        | 0.89        | 0.06        | 0.88        | 0.15        | 326.24      | H                          | 5        | 0.80        | 0.08        | 0.96        | 0.06        | 108.69      |

**Figure S2.** Results of model evaluation for the pink sea fan (*Eunicella verrucosa*) and dead man's fingers (*Alcyonium digitatum*).
